# The core genome $m^5C$ methyltransferase JHP1050 (M.Hpy99III) plays an important role in orchestrating gene expression in *Helicobacter pylori*

Iratxe Estibariz<sup>1,2,3</sup>, Annemarie Overmann<sup>1</sup>, Florent Ailloud<sup>1,2,3</sup>, Juliane Krebs<sup>2</sup>, Christine Josenhans<sup>1,2,3,\*</sup> and Sebastian Suerbaum<sup>1,2,3,\*</sup>

<sup>1</sup>Medical Microbiology and Hospital Epidemiology, Max von Pettenkofer Institute, Faculty of Medicine, LMU Munich, München, Germany, <sup>2</sup>Institute of Medical Microbiology and Hospital Epidemiology, Hannover Medical School, Hannover, Germany and <sup>3</sup>German Center for Infection Research (DZIF), Munich Site, Munich, Germany

Received August 15, 2018; Revised December 18, 2018; Editorial Decision December 19, 2018; Accepted December 21, 2018

## ABSTRACT

*Helicobacter pylori* encodes a large number of restriction–modification (R–M) systems despite its small genome. R–M systems have been described as ‘primitive immune systems’ in bacteria, but the role of methylation in bacterial gene regulation and other processes is increasingly accepted. Every *H. pylori* strain harbours a unique set of R–M systems resulting in a highly diverse methylome. We identified a highly conserved GCGC-specific  $m^5C$  MTase (JHP1050) that was predicted to be active in all of 459 *H. pylori* genome sequences analyzed. Transcriptome analysis of two *H. pylori* strains and their respective MTase mutants showed that inactivation of the MTase led to changes in the expression of 225 genes in strain J99, and 29 genes in strain BCM-300. Ten genes were differentially expressed in both mutated strains. Combining bioinformatic analysis and site-directed mutagenesis, we demonstrated that motifs overlapping the promoter influence the expression of genes directly, while methylation of other motifs might cause secondary effects. Thus,  $m^5C$  methylation modifies the transcription of multiple genes, affecting important phenotypic traits that include adherence to host cells, natural competence for DNA uptake, bacterial cell shape, and susceptibility to copper.

## INTRODUCTION

Epigenetics denotes inheritable mechanisms that regulate gene expression without altering the DNA sequence. In prokaryotes, methyltransferases (MTases) transfer methyl groups from S-adenosyl methionine to adenines or cy-

tosines within a DNA target motif and so contribute to changes of the epigenome (1–3). MTases either belong to restriction–modification (R–M) systems that include MTase and restriction endonuclease (REase) activities, or occur as orphan MTases in the absence of a cognate restriction enzyme (4). Three types of DNA methylation occur in bacteria, N6-methyladenine ( $m^6A$ ), 5-methylcytosine ( $m^5C$ ) and N4-methylcytosine ( $m^4C$ ) (1,2). So far, the major role allocated to bacterial R–M systems is self-DNA protection by restriction of incoming foreign un-methylated DNA (5), and they have thus been described as ‘primitive immune systems’ (6). Other functions have also been attributed to prokaryotic R–M systems (7–9). For example, methylation marks promoter sequences and alters DNA stability and structure, modifying the affinity of DNA binding proteins and influencing the expression of genes (10,11). Additionally, disturbance of DNA strand separation by methylation can have an effect on gene expression (12).

Methylation can be involved in multiple bacterial functions. In *Escherichia coli*, the Dam adenine MTase plays an essential role in DNA replication (13,14). Another well-studied example is the CcrM MTase from *Caulobacter crescentus* that controls the progression of the cell cycle (15). Furthermore, phase-variable MTases have been shown to control the regulation of multiple genes in several different pathogens, including *Haemophilus influenzae*, *Neisseria meningitidis* and *Helicobacter pylori* (16–18). These MTase-dependent regulons were termed phasevarions (19). As described previously, adenine methylation has been shown to play a key role in transcriptional regulation but the influence of cytosine methylation in gene expression has so far only been investigated in very few studies (20–22).

*Helicobacter pylori* infection affects half of the world’s population and is a major cause of gastric diseases that include ulcers, gastric cancer, and MALT lymphoma (23). This gastric pathogen has coexisted with humans since, at

\*To whom correspondence should be addressed. Tel: +4989218072801; Fax: +4989218072802; Email: suerbaum@mvp.uni-muenchen.de  
Correspondence may also be addressed to Christine Josenhans. Email: josenhans@mvp.uni-muenchen.de

least, 88 000 years ago (24). *Helicobacter pylori* strains display an extraordinary genetic diversity caused in part by a high mutation rate but especially by DNA recombination occurring during mixed infection with other *H. pylori* strains within the same stomach (25–27). The very high sequence diversity of *H. pylori* and the coevolution of this pathogen with its human host have caused its separation into phylogeographic populations, whose distribution reflects human migrations (28–30).

Despite its small genome, *H. pylori* is one of the pathogens with the highest number of R–M systems (31). The development of Single Molecule, Real-Time (SMRT) Sequencing technology has allowed genome-wide studies of methylation patterns and strongly accelerated the functional elucidation of MTases and their roles in bacterial biology (32,33). Methylation studies of several *H. pylori* strains have revealed that every strain carries a different set of R–M systems leading to highly diverse methylomes (34–37). R–M systems in *H. pylori* were shown to protect the bacterial chromosome against the integration of non-homologous DNA (e.g. antibiotic resistance cassettes), while they had no significant effect on recombination between highly homologous sequences, permitting efficient allelic replacement (9). Despite the diversity of methylation patterns, a small number of target motifs were shown to be methylated in all (one motif, GCGC) or almost all (3 motifs protected in >99% of strains) *H. pylori* strains in a study by Vale *et al.*, who tested genomic DNAs purified from 221 *H. pylori* strains for susceptibility to cleavage by 29 methylation-sensitive restriction enzymes, and in those studies investigating the methylomes of multiple *H. pylori* strains (34,35,37,38). R–M systems have also previously been shown to contribute to gene regulation in *H. pylori*; the phase-variable MTase ModH5 is involved in the control of the expression of virulence-associated genes like *hopG* or *flaA* in strain P12 (39,40).

In the present study, we functionally characterized the role of a highly conserved <sup>m5</sup>C MTase (JHP1050, M.Hpy99III) in *H. pylori* (41). We show the MTase gene to be part of the *H. pylori* core genome, present and predicted to be active in all of several hundred *H. pylori* strains representative of all known phylogeographic populations. Transcriptome comparisons of two *H. pylori* wild-type strains and their respective knockout mutants demonstrated that JHP1050 has a strong impact on the *H. pylori* transcriptome that includes both conserved and strain-specific regulatory effects. We show that <sup>m5</sup>C methylation of GCGC sequences, among others, affects metabolic pathways, competence and adherence to gastric epithelial cells. Moreover, we provide evidence that methylation of GCGC motifs overlapping with promoter sequences can play a direct role in gene expression, while the regulatory effects of methylated sites outside of promoter regions may be indirect.

## MATERIALS AND METHODS

### Bacterial culture, growth curves and transformation experiments

*H. pylori* strains 26695 (42), J99 (43), BCM-300 (35) and H1 (44) were cultured on blood agar plates (45), or in liquid cultures as described (9). Microaerobic conditions were generated in airtight jars (Oxoid, Wesel, Germany) with

Anaerocult C gas producing bags (Merck, Darmstadt, Germany). For growth curves, liquid cultures were inoculated with bacteria grown on agar plates for 22–24 h to a starting OD<sub>600</sub> of ~0.06 and incubated with shaking (37°C, 140 rpm, microaerobic conditions). The OD<sub>600</sub> was repeatedly measured until a maximum incubation time of 72 hours. The generation time for *H. pylori* strains J99 and 26695 was calculated to be 3.90 and 4 h respectively, similar to previous calculations (46).

Susceptibility to copper was tested by adding copper sulfate (final concentrations, 0.25 and 0.50 mM) to liquid cultures. The OD<sub>600</sub> was measured 24 h after inoculation.

For transformation experiments, liquid cultures of the recipient strain were grown overnight (conditions described above). Then, 1 µg/ml of donor bacterial genomic DNA (gDNA) was added to the cultures. The donor gDNA for transformation experiments was purified from isogenic *H. pylori* strains carrying a chloramphenicol (CAT) resistance cassette within the non-essential *rdxA* gene (i.e. J99 *rdxA::CAT*). After gDNA addition, the cultures were incubated for 6–8 h under the same conditions (37°C, 140 rpm, microaerobic atmosphere). Next, the OD<sub>600</sub> was measured and adjusted to the same number of cells (OD<sub>600</sub> = 1 as 3 × 10<sup>8</sup> bacteria). Finally, 100 µl of serial dilutions were plated onto blood agar plates containing chloramphenicol, and incubated at 37°C under microaerobic conditions. Approximately 4–5 days later, colonies were counted and the efficiency of transformation was calculated as cfu/ml.

### DNA and RNA extraction

gDNA was isolated from bacteria grown on blood agar plates using the Genomic-tip 100/G kit (Qiagen, Hilden, Germany) following the manufacturer's protocol. The gDNA pellet was dissolved over night at room temperature with EB buffer.

For RNA extraction, 5 ml of bacterial cells grown in liquid medium were pelleted (4°C, 6000 × g, 3 min), snap-frozen in liquid nitrogen and stored at –80°C. Afterwards, bacterial pellets were disrupted with a FastPrep<sup>®</sup> FP120 Cell Disrupter (Thermo Savant) using Lysing Matrix B 2 ml tubes containing 0.1 mm silica beads (MP Biomedicals, Eschwege, Germany). Isolation of RNA was performed using the RNeasy kit (Qiagen, Hilden, Germany) and on-column DNase digestion with DNase I. A second DNase treatment was carried out using the TURBO DNA-free<sup>™</sup> Kit (Ambion, Kaufungen, Germany). Isolated RNA was checked for the absence of DNA contamination by PCR.

DNA and RNA concentrations were measured using a NanoDrop 2000 spectrophotometer (Peqlab Biotechnologies). RNA quality given as RINe number was measured with an Agilent 4200 Tape Station system using RNA Screen Tapes (Agilent, Waldbronn, Germany). All RINe numbers of RNA preparations used for further processing were higher than 8.2, confirming high quality and little RNA degradation.

### Construction of mutants and complementation

Inactivation of the MTase or the whole R–M system genes was carried out by insertion of an *aphA3* cassette conferring resistance to kanamycin (Km). A PCR product was

constructed using a combination of primers which added restriction sites and allowed overlap PCR with the *aphA3* cassette (Q5 Polymerase, NEB, Frankfurt am Main, Germany). Ligation of the overlap amplicon with a digested pUC19 vector was done using Quick Ligase (NEB, Frankfurt am Main, Germany). The resulting plasmids were transformed into *E. coli* MC1061. Following plasmid isolation, 750 ng of the plasmids were used for *H. pylori* transformation. Functional complementation of the MTase gene in the strains 26695-mut, J99-mut and BCM-300-mut was achieved by means of the pADC/CAT suicide plasmid approach, as described (47). Transformation of the recipient strains with the resulting plasmid permitted the chromosomal integration of the MTase gene (from strain 26695) into the urease locus, placing the inserted gene under the control of the strong promoter of the *H. pylori* urease operon. The complemented strains were designated 26695-compl, J99-compl and BCM-300-compl, respectively.

Five different methylation motif mutants carrying either a single point mutation in one of the three GCGC motifs of gene *jhp0832*, or a combination of two mutations were constructed using the Multiplex Genome editing (MuGent) technique as described (9,48), with the exception that we used a chloramphenicol resistance cassette within the non-essential *rdxA* locus as selective marker. Sanger sequencing was used to verify the acquisition of the desired mutations within the GCGC motifs. The putative promoter of the gene was predicted within the 50 bp upstream of the transcriptional start site (49) using the BPRom Softberry online tool (50) and verified manually by comparison with *H. pylori* promoter consensus sequences (51). All *H. pylori* mutants were checked via PCR and selected on antibiotic-containing plates. The absence or recovery of methylation was checked by digestion of gDNA with HhaI (NEB, Frankfurt am Main, Germany). All plasmids and primers used in this study are listed in Supplementary Tables S6 and S7.

## Microscopy

Live and dead (L/D) staining was performed using the BacLight Bacterial Viability kit (Thermo Fisher Scientific, Darmstadt, Germany) according to the manufacturer's instructions. Bacteria were harvested from plates incubated for 22–24 h, and suspended in 1 ml of BHI medium without serum to an adjusted OD<sub>600</sub> of ~0.1. Then, 100 µl of this dilution were mixed with the BacLight dyes, giving green and red fluorescence for live and dead/dying bacteria, respectively. After 30 minutes of incubation at room temperature and in the dark, 0.5 µl of the mix was suspended on slides that were analyzed with an Olympus BX61-UCB microscope equipped with an Olympus DP74 digital camera. Between 80 and 100 pictures from at least two independent biological and technical replicates were obtained and analyzed with the CellSens 1.17 software (Olympus Life Science) and ImageJ (52).

Gram staining was performed as follows: 300 µl of liquid cultures grown over-night were pelleted (6000 × g, 3 min, room temperature) and washed 3 times with PBS (6000 × g, 3 min, room temperature). Afterward, 100 µl of the pellets resuspended in PBS were added to a glass slide that

was dried at 37°C during 10–15 min, heat-fixed and Gram-stained.

## Bacterial cell adherence assays

Assays for bacterial adherence to the human stomach carcinoma cell line AGS were performed as previously described with slight modifications (53,54). *Helicobacter pylori* strains grown to an OD<sub>600</sub> ~1 were suspended in RPMI 1640 medium supplemented with 10% fetal calf serum (FCS). Experiments were executed in 96-well plates containing 2 × 10<sup>5</sup> fixed AGS cells (ATCC CRL-1739) per well. AGS cells were fixed with 2% freshly prepared paraformaldehyde in 100 mM potassium phosphate buffer (pH 7) and subsequently quenched and washed as described (53). Live *H. pylori* bacteria were added to cells at a bacteria:cell ratio of 50 (54), followed by brief centrifugation (300 × g, 5 min), and co-incubated for 1 h at 37°C with 5% CO<sub>2</sub>. After this, plates were washed twice with PBS, followed by overnight fixation with 50 µl of fixing solution (see above). Fixing solution was renewed once and incubated for an additional 30 min, and quenched twice with 50 µl of quenching buffer for 15 min. Bacterial adherence to the AGS cells was subsequently quantitated using antibody-based detection as follows: cells were washed three times with washing buffer PBS-T (PBS + 0.05% Tween20), blocked for 30 min with 200 µl of the assay diluent (10% FCS in PBS-T) and washed four times with PBS-T. Then, 100 µl of a 1:2,500 dilution of the primary antibody, α-*H. pylori* (DAKO/Agilent Technologies, Hamburg, Germany) was added and incubated for 2 h. Afterward, cells were washed and incubated with 100 µl of a 1:10 000 dilution of the secondary antibody, goat anti-rabbit HRP-coupled (Jackson ImmunoResearch, Ely, United Kingdom) for 1 h. After four final wash steps, the 96-well plates were finally incubated with 100 µl TMB substrate solution (1:1, Thermo Fisher Scientific, Darmstadt, Germany). The color reaction was developed in the dark for 30 min and stopped with 50 µl of phosphoric acid (1 M). Absorbance was measured at 450/540 nm (Sunrise™ Absorbance Reader). Negative controls (mock-coincubated, fixed AGS cells) were treated the same way with primary and secondary antibody dilutions.

## Bioinformatic analyses

To analyze the conservation and the genomic context of the JHP1050 MTase gene in a diverse collection of *H. pylori* strains, we assembled a database consisting of 459 *H. pylori* genomes that included strains from all known phylogeographic populations and subpopulations (Supplementary Table S1). Genomes and methylomes of the four strains investigated in this study have been published previously (34,35,42–44), with the exception of the H1 methylome (own unpublished data). The nucleotide sequence of gene *jhp1050* from the *H. pylori* strain J99 was used to identify and extract the *jhp1050* homologs and the sequences of the flanking genes. The NCBI blastn microbes and StandAlone Blast tools were used to extract the sequences from publicly available genomes and private genomes, respectively.

To study whether the methylated cytosines of the GCGC motifs had a higher tendency to deaminate (<sup>m5</sup>C>T) than

unmethylated cytosines, we compared the frequency of C>T transitions to either C>A or C>G polymorphisms inside and outside of GCGC motifs among a phylogeographically distinct set of *H. pylori* genomes. GCGC motifs were identified in two *H. pylori* genomes, 26695 and PeCan18, which were subsequently used as reference and aligned separately against 11 other *H. pylori* genomes using BioNumerics version 7.6 (Applied Maths, Sint-Martens-Latem, Belgium). Polymorphisms were called in both alignments and pooled together. The percentage of mutated <sup>m5</sup>C positions within GCGC motifs was determined for each possible transition or transversion as follows:

$$\% = \frac{\text{number of m5C} \rightarrow \text{base} * 100}{\text{total of motifs in the reference}}$$

Since the G<sup>m5</sup>CGC motif is palindromic, the same analysis was performed for the complementary strand, where the position of the second G (<sup>m5</sup>C in the complementary strand) was compared for each possible mutation and calculated as above.

Finally, the percentage of mutated C outside GCGC motifs calculated as follows for each possible mutation:

$$\% = \frac{(\text{Total number of C} \rightarrow \text{base} - \text{number of m5C} \rightarrow \text{base}) * 100}{\text{Total number of C in the reference genome}}$$

The same analysis was performed for other <sup>m5</sup>C motifs and for non-methylated motifs as well as for the non-methylated C of the GCGC motif.

### Expected sites

The expected number of motifs per kb was calculated as follows:

$$\text{Expected sites/kb} = \frac{\text{Total observed GCGC motifs} * 1000 \text{ (bp)}}{\text{genome length (bp)}}$$

The expected number of motifs/kb was 3.89 (J99), 3.91 (BCM-300), 3.76 (26695) and 3.74 (H1). The expected number of motifs within CDS can then be calculated using the expected number of motifs/kb and the gene length. Finally, the ratio observed/expected (O/E) motifs within CDS was calculated to detect genes enriched for the presence of specific sequence motifs. For example, for a given gene in J99 that is 630 bp long and has two GCGC motifs (observed), the expected number of motifs within that gene would be: 630\*3.89/1000. For this example calculation, the O/E ratio would be 0.82, suggesting GCGC motifs are under-represented in this gene.

The GCGC motif is a 4-mer palindrome. In order to calculate the expected number of motifs that would randomly occur within a genome fragment (either CDS or intergenic region), we took into account the number of 4-mers in a given sequence,  $N - K + 1$  (where  $N$  means sequence length and  $K$  the motif length, in this case 4), and the frequency of G/C (0.2) and A/T (0.3), and calculated the expected number of motifs in a specific fragment as  $(N - K + 1) * (0.2)^4$ .

### RNA-Seq analysis

RNA-Seq analysis was performed on an Illumina HiSeq sequencer obtaining single end reads of 50 bp. Ribosomal

RNA (rRNA) depletion was performed prior to cDNA synthesis using a RiboZero Kit (Illumina, Germany). Isolated RNA from a total of  $6 \times 10^8$  to  $1 \times 10^9$  bacterial cells corresponding to log phase of growth was used for sequencing. Three biological replicates were used for all the strains, except for J99-mut since one replicate had to be discarded during library preparation. Mapping of reads to a reference genome was done with Geneious 11.0.2 (55). Reads mapping multiple locations or intersecting multiple CDS were counted as partial matches (i.e. 0.5 read). Differential expression was calculated using DESeq2 (56). Fold change (FC) of two and FDR adjusted  $P$ -value of 0.01 were used as a cut-off.

### Quantitative PCR (qPCR)

One  $\mu\text{g}$  of RNA was used for cDNA synthesis using the SuperScript<sup>TM</sup> III Reverse Transcriptase (Thermo Fisher Scientific, Darmstadt, Germany) as described before (54). qPCR was performed with gene specific primers (Supplementary Table S7) and SYBR Green Master Mix (Qiagen, Hilden, Germany). Reactions were run in a BioRad CFX96 system. Standard curves were produced and samples were run as technical triplicates. For quantitative comparisons, samples were normalized to an internal 16S rRNA control qPCR. Details about the reaction conditions in compliance with the MIQE guidelines are specified in Supplementary Methods 1.

## RESULTS

### Distribution of the G<sup>m5</sup>CGC R-M system (JHP1049-1050) within a globally representative collection of *H. pylori* genomes

Despite the extensive inter-strain methylome diversity of *H. pylori*, a small number of motifs have been shown to be methylated in all or most of the strains (38). Here, we focused on the MTase JHP1050 (M.Hpy99III), which methylates GCGC sequences, resulting in G<sup>m5</sup>CGC motifs. Although <sup>m5</sup>C methylation is less common in prokaryotes than <sup>m6</sup>A methylation, based on the Restriction Enzyme Database (REBASE) (57), this particular motif is highly conserved in many bacterial species.

We therefore hypothesized that the GCGC-specific MTase in *H. pylori* might play an important role apart from self-DNA protection.

We first analyzed the conservation and the genomic context of the MTase gene. The nucleotide sequence of gene *jhp1050* from the *H. pylori* strain J99 was used to identify the *jhp1050* homologs and the sequences of the flanking genes in a collection of 458 *H. pylori* genomes representing all known phylogeographic populations (Supplementary Table S1).

Based on the gene sequences, the M.Hpy99III MTase was predicted to be active in all *H. pylori* strains. The MTase sequence was highly conserved between all 459 strains, with an average nucleotide sequence identity of  $94.04 \pm 2.03\%$ , and a lowest nucleotide sequence identity of 87% between the most dissimilar alleles. The analyzed region of the chromosome was also highly conserved among the strains and all the flanking genes were present with the exception of

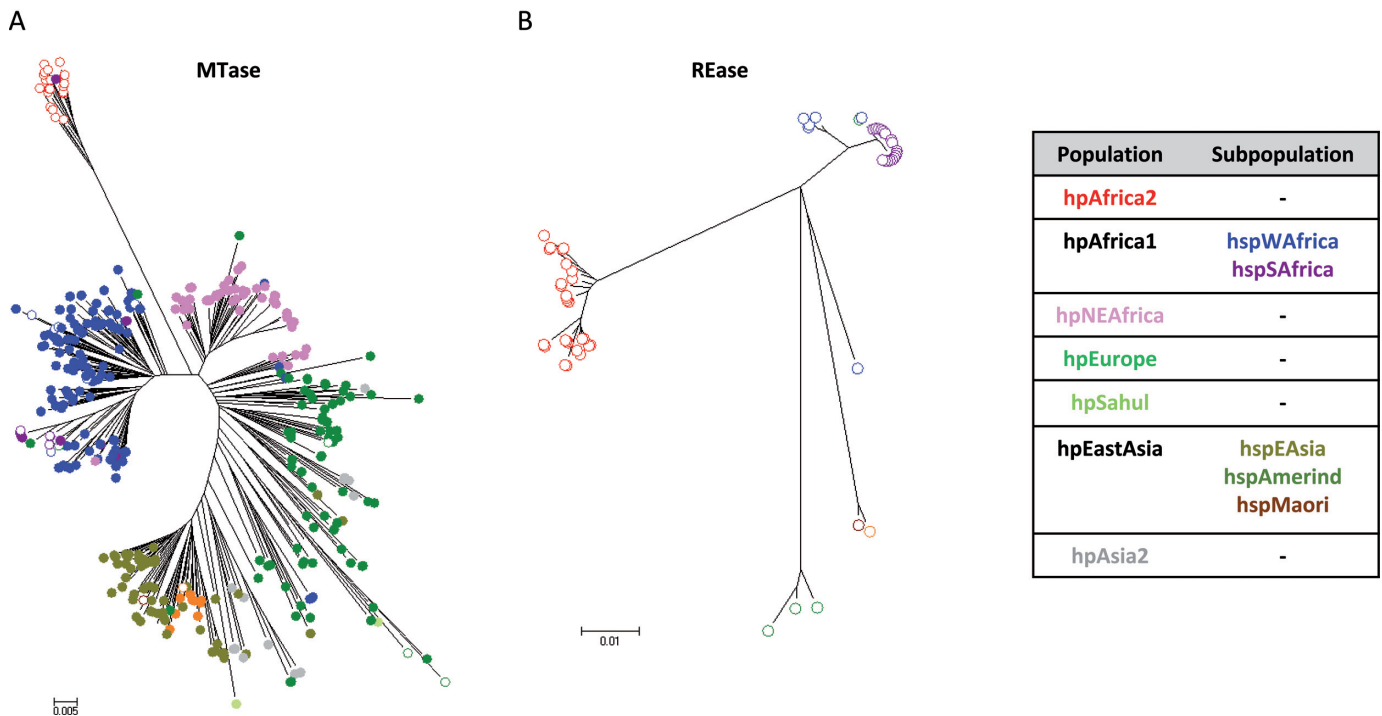

**Figure 1.** Phylogenetic analysis of the GCGC-specific R–M system JHP1050/1049 (M.Hpy99III/Hpy99III) in *H. pylori*. Neighbour-Joining trees based on the nucleotide sequences of MTase M.Hpy99III (A) and REase Hpy99III (B). In both cases, strain symbols are colored according to the phylogeographic population assignment based on seven gene MLST and STRUCTURE analysis (see right panel for color coding). Filled circles represent strains without REase gene, while unfilled circles are used for strains containing both MTase and REase genes.

the cognate REase gene (*jhp1049*) which was present in only 61 of the 459 strains. Interestingly, the majority of the REase-positive strains belong to populations with substantial African ancestry, particularly to hpAfrica2, followed by hspSAfrica, hspWAfrica and hpEurope. Furthermore, none of the analyzed hspAsia2 or hspEAsia strains carried the REase gene (Supplementary Table S1). Only 15 REase genes were predicted to be functional, while the others were pseudogenes due to premature stop codons and/or frameshift mutations (Supplementary Table S2). We identified a 10 bp repeat sequence flanking the REase gene. The same sequence was found downstream of the MTase gene and 48 bp upstream of *jhp1048* in 15 of the REase-negative strains. In all cases, the sequence contained a homopolymeric region with a variable number of adenines. This suggests that the REase gene was excised from the genome. The same sequence was found in *H. cetorum* and *H. acinonychis*, the closest known relatives of *H. pylori* (Supplementary Table S3 and Supplementary Figure S1). Moreover, the phylogenetic trees of MTase and REase gene sequences in general were congruent with the global population structure of *H. pylori* (Figure 1) (24). This implies that the R–M system was acquired early in the history of this gastric pathogen. The REase gene appears to have been lost later during species evolution in the majority of the strains, likely before the first modern humans left Africa. Nonetheless, the REase gene could have been reintroduced in some strains (i.e. hpEurope strains) via recombination of the flanking repeats.

### Construction of MTase mutants and analysis of target motif abundance

To functionally characterize this highly conserved MTase, we constructed MTase-deficient mutants. The MTase gene was disrupted in the strains 26695 (hpEurope), H1 (hspEAsia) and BCM-300 (hspWAfrica) and the whole R–M system was inactivated in strain J99 (hspWAfrica), the only of the four strains that contained both MTase and REase. Genes were inactivated by insertion of an antibiotic resistance cassette. The loss of methylation was verified by restriction assays using the restriction enzyme HhaI that only cleaves unmethylated GCGC sequences (Supplementary Figure S2). In the following text, mutants are named by the wild type strain name followed by –mut. Complementation of the MTase in strains 26695, J99 and BCM-300 was performed by reintroducing the MTase gene of 26695 (see Materials and Methods). The transcription of the MTase gene was tested in the four wild type strains and in two of the complemented mutant strains (J99-compl and 26695-compl). The transcript amounts of the MTase varied substantially between wild type strains (Supplementary Figure S3). Whether these differences between mRNA amounts have any functional implications is currently unknown.

Methylome comparison of the four strains exhibited only four methylated motifs shared between the strains ( $G^{m5}CGC$ ,  $G^{m6}ATC$ ,  $C^{m6}ATG$  and  $G^{m6}AGG$ ) (Supplementary Table S4). All of these motifs occur frequently in the J99 genome (GCGC, 6399 motifs; GATC, 5479; CATG,

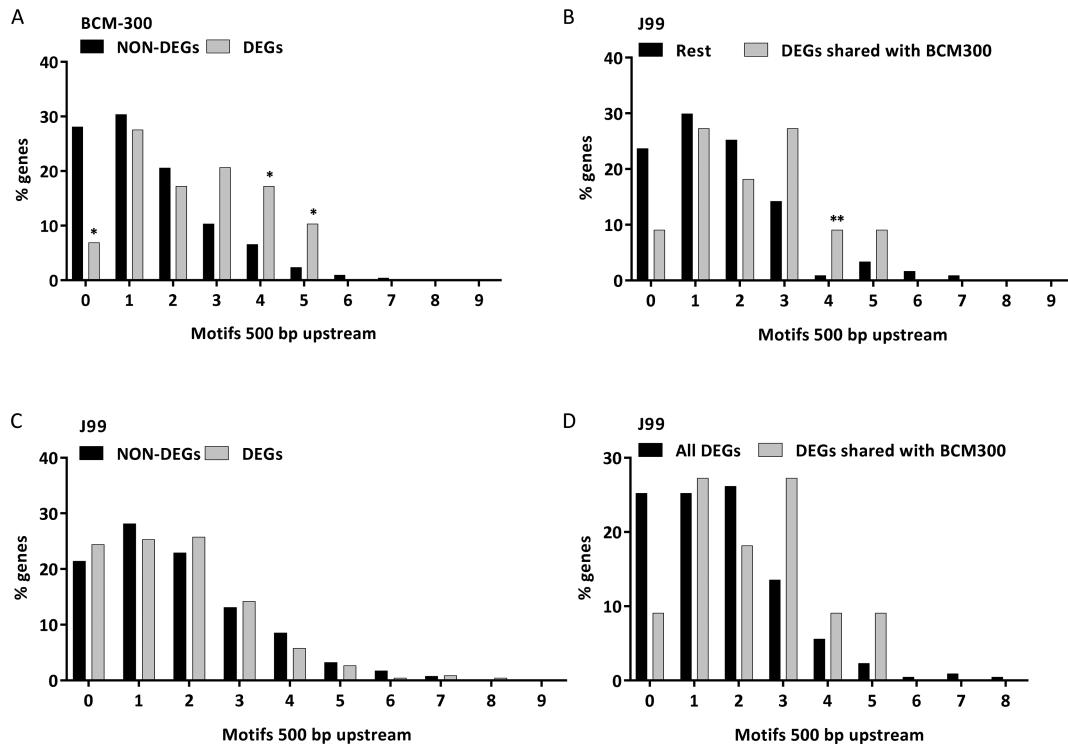

**Figure 2.** Graphical representation of the percentage of genes with GCGC motifs 500 bp of sequence upstream of the start codon for differentially expressed genes (DEGs) and genes not showing differential expression (Non-DEGs). Non-DEGs versus DEGs in BCM-300 (A) and J99 (C). DEGs in J99 shared with BCM-300 versus the rest of the J99 genes (B). DEGs in J99 shared with BCM-300 versus the rest of the J99 DEGs (all DEGs) (D). Statistics: Chi-square, \* $P < 0.05$ , \*\* $P < 0.01$ .

7560; GAGG, 5027). The distribution of GCGC motifs along the genomes was not uniform. We compared this observed distribution to the motif density that would be expected from a random distribution of motifs across the genomes. While the number of motifs was generally higher than expected for a random distribution, fewer motifs than predicted were found in the *cagPAI* and the plasticity zones (PZ) (Supplementary Figure S4A). Finally, we calculated the total number of GCGC motifs that would randomly occur in the complete genomes, the coding regions and the intergenic regions according to the nucleotide composition of *H. pylori*. The observed number of motifs in the coding regions was more than twice the expected number for all four genomes. In contrast, the observed and expected numbers of motifs in the intergenic regions were very similar (Table 1). Therefore, coding sequences appeared to display an over-representation of GCGC motifs.

### Comparative RNA-Seq transcriptome analysis of *H. pylori* J99 and BCM-300 and their isogenic MTase mutants

Due to the extraordinary conservation of the G<sup>m5</sup>CGC MTase in all analyzed strains despite the absence of a cognate REase, we postulated that the function of the enzyme might be more important than simply serving for self-DNA protection. Therefore, in order to study a putative role in gene regulation, we performed comprehensive RNA-Seq

analysis in the strains J99, BCM-300 and the two corresponding isogenic MTase mutants.

Whole transcriptome comparison of the J99-mut and J99 wild type strains exhibited 225 differentially expressed genes (DEGs). One hundred fifteen genes were upregulated and 110 downregulated in J99-mut compared with J99 wild type ( $P$ -adjusted value  $< 0.01$ , fold change (FC)  $> 2$ ). In contrast to J99, the transcriptomes of the BCM-300-mut and wild type strains showed only 29 genes that were differentially expressed in the mutant, all of which were downregulated ( $P$ -adjusted value  $< 0.01$ , FC  $> 2$ ) (Supplementary Table S5). The two mutants, J99-mut and BCM-300-mut, shared 10 downregulated genes but no upregulated genes (Table 2). Using qPCR, we confirmed that 9 of the 10 shared genes were significantly downregulated as shown by RNA-Seq (Supplementary Figure S5). The gene *jhp1283* showed either upregulation or downregulation in different biological replicates.

In order to understand how the distribution of motifs could play a role in transcriptional regulation, we analyzed the frequencies of GCGC motifs in a 500 bp sequence upstream of each DEG and compared those with sequences upstream of genes that were not differentially regulated (non-DEGs), and with coding sequences (CDS).

In strain BCM-300, the number of GCGC motifs located within 500 bp upstream of the start codon was higher for the 29 DEGs than for non-DEGs (Figure 2A). In contrast, in strain J99, the percentage of genes with three or more

**Table 1.** Observed and expected frequencies of GCGC motifs in the genome sequences of the four *H. pylori* strains analyzed in this study

| Strain  | Genome size (bp) | Total length of CDS (bp) | Total length of intergenic sequences (bp) | Predicted no. of GCGC sites/1 kb | No. of motifs in genome | Expected no. of motifs in genome | No. of motifs in CDS | Expected no. of motifs in CDS | No. of motifs in intergenic sequences | Expected no. of motifs in intergenic sequences |
|---------|------------------|--------------------------|-------------------------------------------|----------------------------------|-------------------------|----------------------------------|----------------------|-------------------------------|---------------------------------------|------------------------------------------------|
| 26695   | 1667867          | 1494807                  | 173060                                    | 3.76                             | 6269                    | 2669                             | 5950                 | 2392                          | 319                                   | 277                                            |
| J99     | 1643831          | 1486413                  | 157418                                    | 3.89                             | 6399                    | 2630                             | 6110                 | 2378                          | 289                                   | 252                                            |
| H1      | 1563305          | 1436409                  | 126896                                    | 3.74                             | 5846                    | 2501                             | 5655                 | 2298                          | 191                                   | 203                                            |
| BCM-300 | 1667883          | 1520688                  | 147195                                    | 3.91                             | 6523                    | 2669                             | 6273                 | 2433                          | 250                                   | 236                                            |

**Table 2.** Shared differentially expressed genes (DEGs), displaying GCGC methylation-dependent transcription in *H. pylori* J99 and BCM-300. Positive values for fold change (FC) indicate lower transcription in the mutants compared to the wild type strains

| Gene        | Description                                   | J99 locus_tag                      | J99 FC           | BCM-300 locus_tag                    | BCM-300 FC       |
|-------------|-----------------------------------------------|------------------------------------|------------------|--------------------------------------|------------------|
| <i>bioD</i> | dethiobiotin synthetase                       | <i>jhp_0025</i>                    | 2.1986           | <i>BCM_00034</i><br><i>BCM_00035</i> | 2.9978<br>2.9424 |
| <i>feoB</i> | iron(II) transport protein                    | <i>jhp_0627</i>                    | 3.8803           | <i>BCM_00707</i>                     | 4.3250           |
| -           | unknown                                       | <i>jhp_0749</i>                    | 3.8245           | <i>BCM_00859</i>                     | 3.1947           |
| <i>moeB</i> | molybdopterin/thiamine biosynthesis activator | <i>jhp_0750</i>                    | 4.0863           | <i>BCM_00860</i>                     | 3.6033           |
| -           | unknown                                       | <i>jhp_1102</i>                    | 2.4868           | <i>BCM_01112</i>                     | 2.2810           |
| <i>cah</i>  | alpha-carbonic anhydrase                      | <i>jhp_1112</i>                    | 2.0723           | <i>BCM_01124</i>                     | 3.3563           |
| <i>trmU</i> | tRNA-methyltransferase                        | <i>jhp_1254</i>                    | 4.5288           | <i>BCM_01276</i>                     | 5.7005           |
| -           | unknown                                       | <i>jhp_1281</i>                    | 3.4690           | <i>BCM_01305</i>                     | 2.0216           |
| -           | unknown                                       | <i>jhp_1253</i>                    | 2.9141           | <i>BCM_01275</i>                     | 3.2789           |
| <i>crdR</i> | response regulator                            | <i>jhp_1283</i><br><i>jhp_1443</i> | 2.8855<br>2.9141 | <i>BCM_01307</i>                     | 3.2789           |

GCGC motifs within 500 bp upstream of the start codon was similar for DEGs and non-DEGs (Figure 2C). However, the 10 DEGs of strain J99 that were shared with BCM-300 showed the same overrepresentation of GCGC motifs observed in strain BCM-300 (Figure 2B, D). Furthermore, DEGs in BCM-300 displayed more motifs within their CDS than expected if GCGC motifs were distributed randomly across the whole genome, while the opposite effect occurred for the non-DEGs. The same trend was evident in J99 when we only compared the DEGs shared with BCM-300 with the rest of the genes (Supplementary Figure S6A).

In addition, we observed that 6 of the 10 shared DEGs harbored GCGC motifs within the 50 bp sequence upstream of the TSS described by Sharma and colleagues in strain 26695 (49), called here region upstream of the TSS (upTSS). Sequences within the putative promoter regions immediately upstream of the TSS are likely to exert the strongest influence on transcriptional regulation. We compared the upTSS of 26695 with J99 and BCM-300 via sequence alignment. There were 48 genes in J99 and 45 in BCM-300 with GCGC motifs within the 50 bp upstream sequence (sRNA and asRNA were excluded). In J99, 13 of the 225 DEGs contained GCGC motifs within the upTSS sequence. In BCM-300, 11 of the 29 DEGs contained motifs within the upTSS. This proportion of DEGs with motifs within the upTSS suggests that the window of 50 bp upstream of the TSS may play a role in transcription regulation. Indeed, the FC was slightly increased by motifs within the upTSS (Supplementary Figure S6B). Gene *jhp1283*, the only of the 10 shared DEGs identified by RNA-Seq that was not confirmed in qPCR assays, did not have any GCGC motif within the upTSS, suggesting that this gene might not be directly regulated by methylation.

### Direct regulation of gene expression by <sup>m5</sup>C methylation

Inactivation of the M.Hpy99III MTase had different effects on the transcriptomes of the two strains tested, with far more genes affected in strain J99 versus the BCM-300 strain. We hypothesized that the loss of GCGC methylation might have both direct and indirect effects on transcription. In order to demonstrate a direct association between methylation and gene expression, we generated a set of mutants in strain J99 where site-specific mutations were introduced into selected GCGC motifs located within the CDS as well as in the upstream region of one specific gene showing strong differential regulation.

The selected gene for this approach (*jhp0832*) was downregulated in J99-mut (FC = 5.95). Its homolog in *H. pylori* strain 26695 (HP0893) was reported to be an antitoxin from a Type II Toxin–Antitoxin (TA) system (58). The cognate toxin (*jhp0831*) was also downregulated in J99-mut (FC = 3.64). The two genes belong to the same operon where the antitoxin is located upstream of the toxin. No homologous genes were found in BCM-300.

Two GCGC motifs were located within the 500 bp upstream window of the antitoxin gene and one motif was located within the coding sequence. Of the two upstream motifs, one was located within the upTSS in J99 and overlapped with the -10 box of the predicted promoter (Figure 3). Thus, owing to the high FC and this distribution of three GCGC motifs, *jhp0832* seemed to be a good candidate to dissect the role of different GCGC motifs in the transcriptional regulation of *jhp0832*.

We constructed three mutants where each of the motifs was individually changed to GAGC so that the motif could no longer be methylated (*jhp0832* mut1, *jhp0832* mut2 and *jhp0832* mut3). We also constructed two mutants (*jhp0832*

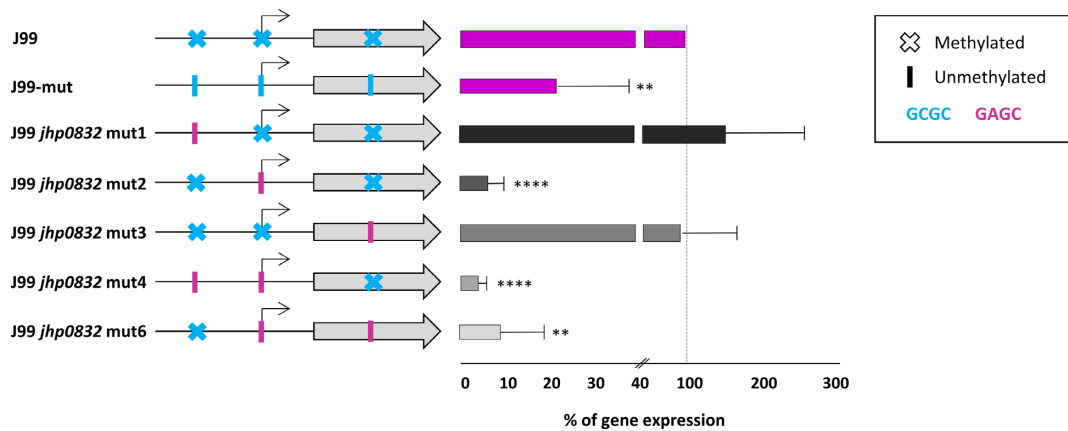

**Figure 3.** Quantification of transcript amounts of *jhp0832* in *H. pylori* strains J99, J99-mut and the J99 mutants with point mutations within the GCGC motifs. qPCR results are represented in the right panel, three different biological replicates were performed. Statistics: One-way ANOVA,  $**P < 0.01$ ,  $****P < 0.0001$ , bars: SD. Legend: The *jhp0832* gene is shown as a gray arrow. The predicted promoter is represented by a black arrow. Crosses represent methylated motifs while vertical lines mean unmethylated motifs (due to site-directed mutation, or to inactivation of the MTase in strain J99-mut). The GCGC motifs appear in blue and the motifs mutated to GAGC are colored in pink.

**Table 3.** List of mutants carrying different point mutations modifying the GCGC motifs within or immediately upstream of *jhp0832*

| Mutant name         | GCGC motif mutated | Plasmid            |
|---------------------|--------------------|--------------------|
| <i>jhp0832</i> mut1 | 1                  | pSUS3427           |
| <i>jhp0832</i> mut2 | 2                  | pSUS3428           |
| <i>jhp0832</i> mut3 | 3                  | pSUS3429           |
| <i>jhp0832</i> mut4 | 1, 2               | pSUS3427, pSUS3428 |
| <i>jhp0832</i> mut6 | 2, 3               | pSUS3428, pSUS3429 |

All mutants were constructed using the MuGent technique (see Materials and Methods) using the indicated plasmids and the *rdxA::CAT* PCR product. Thus, all the mutants were resistant to chloramphenicol.

*mut4* and *jhp0832* *mut6*) where two out of the three GCGC motifs were mutated (Figure 3A, Table 3). We were unable to generate a triple mutant carrying combined point mutations in all three motifs, which might be due to toxic dysregulation of the toxin–antitoxin system after removal of all methylatable GCGC motifs.

Differential expression of *jhp0832* was determined by qPCR. Three of the mutants (*jhp0832* *mut2*, *jhp0832* *mut4* and *jhp0832* *mut6*) displayed a strong downregulation of *jhp0832* expression, similar to J99-mut. Interestingly, these mutants shared the mutation in the GCGC motif located within the upTSS and the predicted promoter of the gene. In contrast, modification of the motifs outside of the upTSS did not consistently alter the expression of the gene (Figure 3).

### Phenotypes of *H. pylori* GCGC MTase mutants: growth, viability and shape

In order to test whether the absence of  $m^5C$  methylation and the associated differential transcriptomes had a role in the fitness of *H. pylori*, we determined the growth of the strains in liquid medium (Figure 4A). J99-mut had a significant growth defect compared with the J99 wild type strain. Complementation of the MTase gene restored the observed growth phenotype. Similarly, a significant reduc-

tion in growth was shown for BCM-300-mut at stationary phase that could be restored to wild-type growth by functional complementation. Although non-significant, a slight delay in growth was noted in 26695-mut and H1-mut compared to the wild type and the complemented strains.

Bacterial morphology serves to optimize biological functions and confers advantages to particular niches. *H. pylori* is a spiral-shaped bacterium that can enter a coccoid state under certain stress conditions (59). *H. pylori* J99-mut entered a coccoid state very early in liquid cultures. A substantial proportion of coccoid forms were visible between 6 and 9 h after inoculation while they are rarely found in the wild type strain at this time point (Supplementary Figure S7A). An effect of the inactivation of JHP1050 on the morphology was not observed for the other three strains 24 h post-inoculation (Supplementary Figure S7B). Complementation of J99-mut restored the wild type phenotype. We note that live/dead staining did not show a significant difference between the percentage of live vs. dead bacteria between the wild type and the mutant strains collected from 22–24 h plates. There was a slight reduction in viability in the BCM-300-mut strain, but no differences were found in the other strains (Figure 4B). As in the liquid cultures, an increased number of rounded bacteria were noticed for J99-mut (Figure 4C).

### $m^5C$ methylation contributes to the high mutation frequency in *H. pylori*

*H. pylori* lacks most of the genes involved in mismatch repair (MMR) in other bacteria which is thought to be at least partially responsible for the high mutation rate of this bacterium (42,60). Deamination of  $m^5C$  to thymine (T) is responsible for the most common single nucleotide mutation (61). *H. pylori* is known to have a very high mutation rate, and  $m^5C$  MTases might contribute to that by increasing the number of nucleotides susceptible to deamination. To test whether  $m^5C$  methylation within GCGC motifs played a role in *H. pylori* evolution by favouring deamination, we aligned whole genomes of two *H. pylori* strains (26695



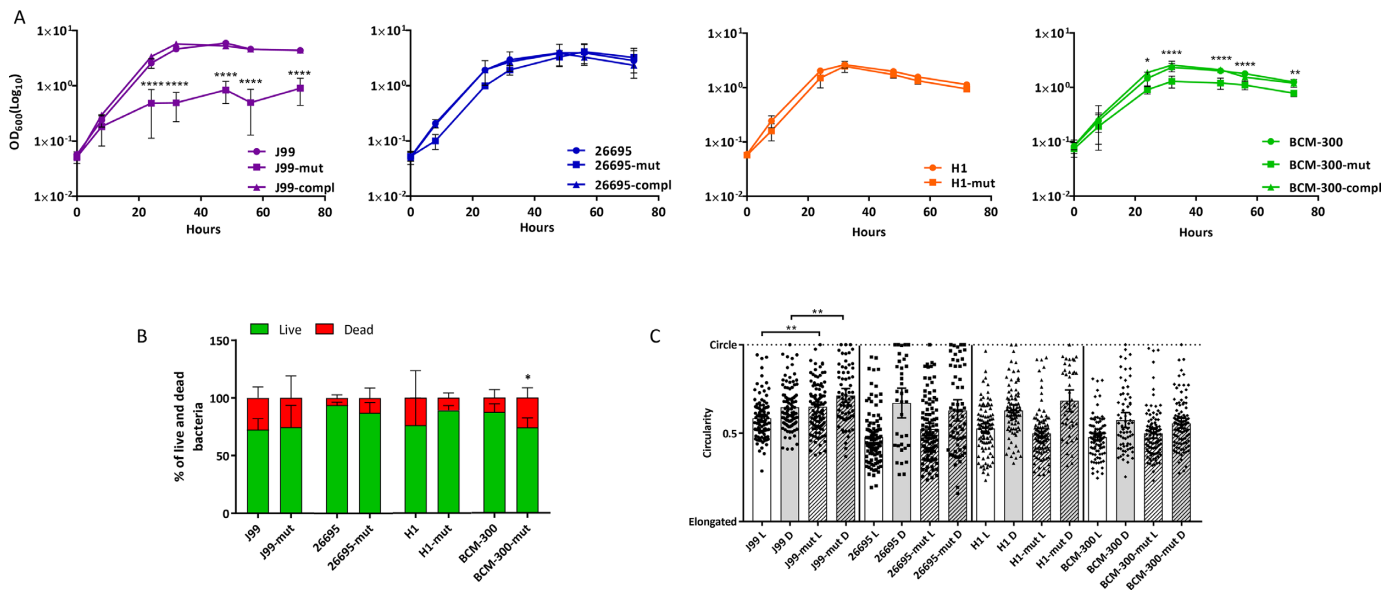

**Figure 4.** MTase JHP1050 inactivation causes phenotypic effects that vary between strains: growth, viability and morphology. (A) Growth curves for four wild type strains and mutants and for the complemented strains J99-compl, 26695-compl and BCM-300-compl were measured for 72 h. The doubling time for *H. pylori* was calculated to be 3.87 h (46). Statistics: two-way ANOVA, \* $P < 0.05$ , \*\* $P < 0.01$ , \*\*\*\* $P < 0.0001$ , bars: SD. (B) Viability of the strains was studied using epifluorescence microscopy after live/dead staining. Statistics: two-way ANOVA, \* $P < 0.05$ , bars: SD. (C) Bacterial morphology was quantitated from epifluorescence microscopy pictures using ImageJ. A value of 0 represents completely elongated bacteria, while a value of 1 means a complete circle (cocci). Statistics: one-way ANOVA, \*\* $P < 0.01$ , bars: 95% confidence interval (CI).

and PeCan18), used as reference, against 11 other complete genome sequences (see Material and Methods for details). The results strongly support a role of <sup>m5</sup>C methylation in *H. pylori* mutagenesis, since the percentage of C→T mutations within GCGC motifs was significantly higher than the overall percentage of C→T or C→ another base transition in the genomes of all the tested strains. In addition, we performed the deamination analysis on (i) other <sup>m5</sup>C methylated cytosines within different motifs, (ii) on non-methylated cytosines within motifs containing <sup>m5</sup>Cs and (iii) non-methylated motifs containing cytosines. We observed a higher frequency of C → T mutations for the <sup>m5</sup>C within the motifs.

Therefore, the <sup>m5</sup>C methylation of the common GCGC motif in all *H. pylori* strains may contribute to the high mutation rate of *H. pylori* and its overall low GC content by favouring deamination (Supplementary Figure S4B).

#### Regulation of Outer Membrane Proteins (OMPs) and adherence by <sup>m5</sup>C methylation in GCGC motifs is strain-specific

OMP genes represent ~4% of the *H. pylori* genome (62). Fourteen OMPs were found to be upregulated in J99-mut (Supplementary Table S5). Confirmation of the upregulation of OMP genes was obtained using qPCR in J99-mut (Supplementary Figure S5C, D). We detected either no regulation or weak upregulation in the other mutated strains (Supplementary Figure S5C, D), which was in agreement with the transcriptome data obtained for BCM-300. Only three of these OMPs were also slightly upregulated in BCM-300-mut, but the FC was lower than the stringent cut-off of 2 used in the transcriptome analyses. A bacterial adherence assay based on coinubation of fixed AGS cells with all four wild type strains and corresponding isogenic GCGC MTase

mutants was performed to test for an adherence phenotype. Only J99-mut had a significantly higher adherence to the cells compared to the respective wild type strain, while no significant differences in adherence were determined for the rest of the strains (Figure 5C). Taken together, the increased expression of a number of OMP genes in the absence of methylation in J99 might contribute to a stronger adherence of the bacteria to the cells, while this was not observed for the other tested strains.

#### GCGC methylation regulates natural competence in *H. pylori*

Natural competence is a hallmark of *H. pylori*. Competence is conferred by the ComB system, an unusual type IV secretion system related to the VirB system of *Agrobacterium tumefaciens* (63). RNA-Seq results identified three *com* genes (*comB8*, *comB9* and *comEC*) that were less transcribed in J99-mut compared to the wild type strain, while the genes were not found to be differentially regulated in BCM-300. ComB9 and ComB8 are part of the outer- and inner-membrane channels of the DNA uptake system, while ComEC allows the translocation of the DNA through the inner membrane to the cytoplasm. qPCR demonstrated the downregulation of these genes in the two additional strains tested, 26695-mut and H1-mut, in comparison with their respective wild type strains (Supplementary Figures S5A and S5B).

The DNA uptake capacity of the four MTase-mutated strains in comparison to the wild types was quantitated by counting recombinant colonies carrying an antibiotic resistance cassette after standardized transformation experiments (see Materials and Methods). A significant reduction in the efficiency of transformation to chloramphenicol

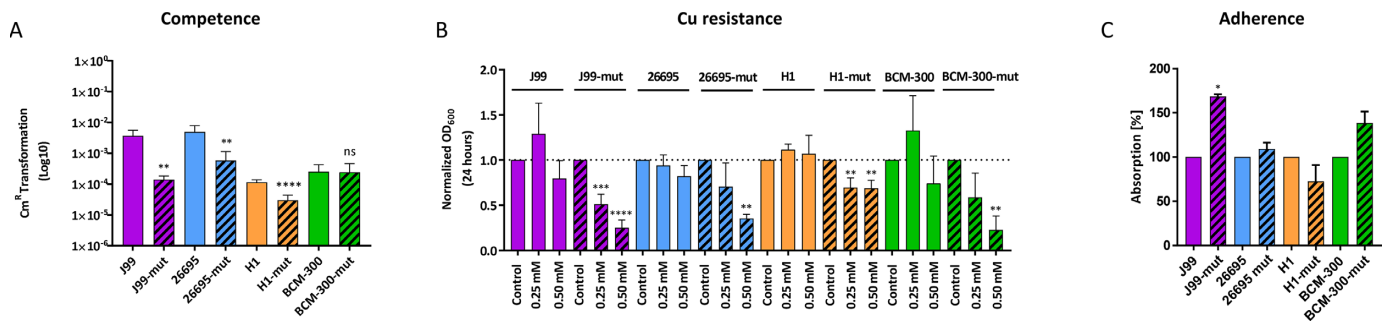

**Figure 5.** MTase JHP1050 inactivation causes phenotypic effects that vary between strains: natural competence, resistance to copper, and adherence to host cells. (A) Transformation experiments were performed with 1  $\mu$ g/ml of gDNA. Statistics: Welch's unpaired *t* test, \*\**P* < 0.01, \*\*\*\**P* < 0.0001, bars: SD. (B) The growth of J99 wild type, J99-mut, BCM-300 wild type and BCM-300-mut strains was measured 24 h post-inoculation after addition of different concentrations of copper sulfate to the cultures. Data was normalized to a control culture without copper. Statistics: One-Way ANOVA, \*\**P* < 0.01, \*\*\**P* < 0.001, \*\*\*\**P* < 0.0001, bars: SD. (C) Adherence of *H. pylori* wild type and mutant strains to fixed AGS cells. Statistics: unpaired *t*-test, \**P* < 0.05, bars: SD.

resistance was observed in the J99, 26695 and H1 mutants compared to their respective wild type strains, but no difference was apparent for BCM-300 (Figure 5A). The down-regulation of these three components of the ComB system might be sufficient to reduce the competence in three of the strains.

#### Loss of <sup>m5</sup>C methylation of GCGC motifs increases susceptibility to copper

Copper is an essential metal used by *H. pylori* as a cofactor in multiple processes and it has been shown, for example, to be important for colonization (64). However, an excess of heavy metals can be toxic for the bacterial cells, leading to the existence of several mechanisms to control copper homeostasis. One of the mechanisms involves the two-component system CrdR/S. In the presence of copper, the sensor kinase CrdS phosphorylates the response regulator CrdR triggering the activation of a copper resistance protein and a copper efflux complex (65).

The transcriptional regulator gene *crdR* was less expressed in both J99 and BCM-300 MTase mutants (Table 2). In both strains, one GCGC motif is located within the upTSS of the transcriptional regulator, suggesting a direct regulation via <sup>m5</sup>C methylation. To test whether the mutated strains were less resistant to copper due to the lower expression of the *crdR* gene, we compared the influence of added copper sulfate on growth in liquid culture between MTase mutants and wild type strains. The presence of copper caused a clear growth defect of the mutants when compared with the wild type strains, and with a control culture without added copper (Figure 5B). The results indicate that <sup>m5</sup>C methylation within the upTSS is required to ensure sufficient transcription of the transcriptional regulator to protect against an excess of copper.

## DISCUSSION

Most previous studies of R–M systems in *Helicobacter pylori* have focussed on the striking diversity of methylation patterns and its implications. In contrast to the dozens of MTases only present in subsets of strains, *H. pylori* also possesses few enzymes that are highly conserved between

strains. Here, we have explored the function of one <sup>m5</sup>C MTase (JHP1050) that is very highly conserved and that we predicted to be active in all of a globally representative collection of 459 *H. pylori* strains analyzed. The collection included isolates from the most ancestral *H. pylori* population, hpAfrica2, and the presence of the MTase in all *H. pylori* phylogeographic populations and subpopulations indicates that the gene has been part of the *H. pylori* core genome since before the Out of Africa migrations, and before the *cag* pathogenicity island was acquired (24). The cognate REase gene was detected in few strains only, almost all of which belong to African *H. pylori* populations. This indicates that the REase was lost from the genome very early in the history of this gastric pathogen. These data indicate a strong selective pressure to maintain the presence and activity of the MTase, while the REase gene either lost its function or was completely deleted. The apparent strong selection of the maintenance of this MTase in the *H. pylori* genome was in striking contrast to the cognate REase and to the vast majority of R–M systems so far identified in *H. pylori*, indicating that the MTase alone is likely to serve an important function for the bacterium. Since methylation has been shown to influence gene expression in several bacterial species, we considered a regulatory function most likely, and performed global transcriptome analysis using RNA-Seq.

The results obtained by RNA-Seq analysis of two *H. pylori* wild type strains, J99 and BCM-300, and their respective MTase mutants confirmed our hypothesis that GCGC methylation affects the transcription of multiple *H. pylori* genes, but we were surprised by the substantial differences between the two strains. While there were 225 DEGs in J99, whose transcription was significantly changed in the MTase mutant, only 29 genes showed an altered expression in BCM-300, and only 10 DEGs were shared between both strains.

To better understand the relationship between GCGC methylation and transcriptional gene regulation, we studied the correlation between the presence of GCGC motifs within coding sequences and upstream regulatory sequences and the effect of a loss of methylation on transcription. When we screened the 500 bp of sequence upstream of

the start codons of all DEGs for GCGC motifs and compared the results with those obtained for the upstream sequences of non-DEGs, we observed that DEGs frequently contained more than three GCGC motifs while the majority of the non-DEGs had 0 or 1 motifs (Figure 2). Among the DEGs, the presence of GCGC motifs within the upTSS was significantly associated with higher fold change (FC) values (Supplementary Figure S6B). Moreover, there were more DEGs with higher number of motifs within the coding sequence than expected when compared with the non-DEGs (Supplementary Figure S6A). These results are similar to reports from *Vibrio cholerae*, where a significant correlation between differential regulation and the number of motifs within the coding sequence was reported for a <sup>m5</sup>C MTase (21).

Six of the 10 DEGs shared between J99 and BCM-300 contained GCGC motifs within the upTSS. We therefore investigated the relationship between the presence of a methylatable GCGC sequence and gene transcription using site directed mutagenesis. When the GCGC motif overlapping the putative promoter of the DEG *jhp0832* was changed to a non-methylated GAGC motif, this caused a down-regulation of the transcription that was similar to the effect of MTase inactivation, providing strong evidence that methylation of the GCGC motif within a promoter sequence affects gene transcription. Similar findings were previously reported for G<sup>m6</sup>ACC motifs methylated by the *H. pylori* ModH5 MTase, which are involved in the control of the activity of the *flaA* promoter in strain P12 (40). We note that the introduced point mutation itself (in addition to the absence of methylation) might have an influence on the promoter activity. We thus introduced the mut2 allele into a methylase-deficient strain as a control. However, this strain grew so poorly that reliable qPCR assays could not be performed, so that this possibility cannot formally be ruled out. The exact mechanism(s) how methylated sequence motifs within promoters and most likely also within coding sequences influence gene expression in *H. pylori* is still unknown. One emerging paradigm is exemplified by the essential cell cycle regulator GcrA from *Caulobacter crescentus*, a  $\sigma$ 70 cofactor that binds to almost all  $\sigma$ 70 promoters, but only induces transcription of genes that harbour G<sup>m6</sup>ANTC methylated sites in their promoters (66).

The 10 DEGs shared by both strains were less expressed in the absence of methylation. Thus, in contrast to eukaryotes, where CpG methylation in promoter regions leads to the silencing of genes, methylation of GCGC sites in *H. pylori* promoters enhances transcription. Many of the shared DEG belong to conserved cellular pathways (i.e. biotin synthesis, Fe(II) uptake, molybdopterin biosynthesis, bicarbonate and proton production, tRNA modification) and also include a transcriptional regulator involved in copper resistance. Based on these observations, we propose that the conserved GCGC-specific MTase directly controls the expression of those genes involved in various, partially fundamental, cellular pathways.

The inactivation of the MTase caused a substantial growth defect and accelerated conversion to coccoid cells in *H. pylori* J99 that were restored to wild type growth in a complemented strain. The three other wild type strains investigated did not show a similar growth defect when the

MTase was inactivated. Other phenotypic effects induced by the MTase inactivation were observed in all or multiple strains. They included functions important for virulence, such as morphology, competence and adherence to gastric epithelial cells. The genome diversity of *H. pylori*, the distribution of motifs among the genomes and the variable methylomes due to the activity of other MTases must influence global gene expression. It was demonstrated recently that deletions of two strain-specific MTases, the <sup>m5</sup>C MTase M.HpyAVIB (67) and the <sup>m4</sup>C MTase M2.HpyAII (22) both also had regulatory effects on the *H. pylori* transcriptome. While the effects differed widely from those observed for the M.Hpy99III MTase studied here, some genes were differentially regulated by more than one MTase, suggesting that the effects of different MTases may be interlinked. Thus, the strain-specific phenotypes observed in the absence of <sup>m5</sup>C methylation in GCGC motifs are likely to reflect the complex and intrinsic diversity of *H. pylori* at the genome, methylome, and transcriptome levels. It is interesting to note that the overrepresentation of GCGC motifs is far more pronounced in coding sequences, and that *H. pylori* has a strong bias for codons overlapping the GCGC motif, such as CGC as the by far most common codon for arginine, and GCG as the second most common codon for alanine (68). The preference of *H. pylori* for these codons may be one reason why a methyltransferase with specificity for GCGC has evolved to serve such a special function.

While we clearly showed that methylation of a GCGC motif overlapping the promoter within the upTSS directly affected transcription, we currently do not understand how the presence or absence of GCGC methylation can affect so many genes in strain J99, and which mechanisms contribute to strain-variable effects. It seems likely that at least some of the massive changes observed in strain J99 are indirect effects, e.g. resulting from the downregulation of genes affecting growth. The effect of MTase inactivation in any given strain is likely to be the net outcome of interlinked direct and indirect regulatory effects that will need to be further elucidated in the future. Methylation may affect DNA topology, which has a strong influence on genome-wide gene regulation, causing secondary effects on the global transcriptome by a plethora of mechanisms. For example, modifications of DNA topology affect the binding of DnaA to the OriC2 of *H. pylori* (69). The *flaA* promoter, whose expression is governed mainly by the transcription factor  $\sigma^{28}$ , was shown by extensive mutagenesis to be strongly modulated in a topology-dependent manner during the growth phase (70). This also fits to the previously described methylation-dependent indirect regulation of the *flaA* promoter (40). Finally, several direct and indirect means of methylation-mediated regulatory mechanisms might not exclude each other, generating an intricate network fine-tuning gene expression, which depends on genome-wide methylation.

## CONCLUSION

Global changes in <sup>m5</sup>C DNA methylation patterns in *H. pylori* affect the expression of several genes directly or indirectly, which results in both strain-independent (conserved) and strain-dependent effects. Motifs situated within pro-

moter sequences have a direct effect on transcription, while surrounding motifs might modulate the expression indirectly by, for example, altering the topology of the DNA. Furthermore, methylation of GCGC target sequences ensures adequate levels of transcription for numerous genes involved in metabolic pathways, competence and adherence to gastric epithelial cells.

## DATA AVAILABILITY

RNA-Seq data was placed in the ArrayExpress database with accession number: E-MTAB-7162

## SUPPLEMENTARY DATA

Supplementary Data are available at NAR Online.

## ACKNOWLEDGEMENTS

We thank Sandra Nell for help with assembling the collection of 459 globally representative *H. pylori* genomes, and Gudrun Pfaffinger for excellent technical assistance. We also thank three anonymous reviewers for extremely helpful comments.

## FUNDING

German Research Foundation [SFB 900/A1 and SFB 900/Z1 to S.S. and SFB 900/B6 to C.J.]. Funding for open access charge: German Research Foundation (DFG).  
*Conflict of interest statement.* None declared.

## REFERENCES

- Wilson, G.G. and Murray, N.E. (1991) Restriction and modification systems. *Annu. Rev. Genet.*, **25**, 585–627.
- Jeltsch, A. (2002) Beyond Watson and Crick: DNA methylation and molecular enzymology of DNA methyltransferases. *Chem. Bio. Chem.*, **3**, 274–293.
- Roberts, R.J., Belfort, M., Bestor, T., Bhagwat, A.S., Bickle, T.A., Bitinaite, J., Blumenthal, R.M., Degtyarev, S.K., Dryden, D.T., Dybvig, K. *et al.* (2003) A nomenclature for restriction enzymes, DNA methyltransferases, homing endonucleases and their genes. *Nucleic Acids Res.*, **31**, 1805–1812.
- Wilson, G.G. (1991) Organization of restriction-modification systems. *Nucleic Acids Res.*, **19**, 2539–2566.
- Loenen, W.A., Dryden, D.T., Raleigh, E.A., Wilson, G.G. and Murray, N.E. (2014) Highlights of the DNA cutters: a short history of the restriction enzymes. *Nucleic Acids Res.*, **42**, 3–19.
- Kong, H., Lin, L.F., Porter, N., Stickel, S., Byrd, D., Posfai, J. and Roberts, R.J. (2000) Functional analysis of putative restriction-modification system genes in the *Helicobacter pylori* J99 genome. *Nucleic Acids Res.*, **28**, 3216–3223.
- Sanchez-Romero, M.A., Cota, I. and Casadesus, J. (2015) DNA methylation in bacteria: from the methyl group to the methylome. *Curr. Opin. Microbiol.*, **25**, 9–16.
- Ershova, A.S., Rusinov, I.S., Spirin, S.A., Karyagina, A.S. and Alexeevski, A.V. (2015) Role of Restriction–Modification systems in prokaryotic evolution and ecology. *Biochemistry (Mosc.)*, **80**, 1373–1386.
- Bubendorfer, S., Krebs, J., Yang, I., Hage, E., Schulz, T.F., Bahlawane, C., Didelot, X. and Suerbaum, S. (2016) Genome-wide analysis of chromosomal import patterns after natural transformation of *Helicobacter pylori*. *Nat. Commun.*, **7**, 11995.
- Nou, X., Skinner, B., Braaten, B., Blyn, L., Hirsch, D. and Low, D. (1993) Regulation of pyelonephritis-associated pili phasevariation in *Escherichia coli*: binding of the PapI and the Lrp regulatory proteins is controlled by DNA methylation. *Mol. Microbiol.*, **7**, 545–553.
- Wion, D. and Casadesus, J. (2006) N6-methyladenine: an epigenetic signal for DNA-protein interactions. *Nat. Rev. Microbiol.*, **4**, 183–192.
- Severin, P.M.D., Zou, X., Gaub, H.E. and Schulten, K. (2011) Cytosine methylation alters DNA mechanical properties. *Nucleic Acids Res.*, **39**, 8740–8751.
- Messer, W., Bellekes, U. and Lother, H. (1985) Effect of *dam* methylation on the activity of the *E. coli* replication origin, *oriC*. *EMBO J.*, **4**, 1327–1332.
- Kang, S., Lee, H., Han, J.S. and Hwang, D.S. (1999) Interaction of SeqA and Dam methylase on the hemimethylated origin of *Escherichia coli* chromosomal DNA replication. *J. Biol. Chem.*, **274**, 11463–11468.
- Kozdon, J.B., Melfi, M.D., Luong, K., Clark, T.A., Boitano, M., Wang, S., Zhou, B., Gonzalez, D., Collier, J., Turner, S.W. *et al.* (2013) Global methylation state at base-pair resolution of the *Caulobacter* genome throughout the cell cycle. *PNAS*, **110**, E4658–E4667.
- Fox, K.L., Dowdeit, S.J., Erwin, A.L., Srikhanta, Y.N., Smith, A.L. and Jennings, M.P. (2007) *Haemophilus influenzae* phasevarions have evolved from type III DNA restriction systems into epigenetic regulators of gene expression. *Nucleic Acids Res.*, **35**, 5242–5252.
- Srikhanta, Y.N., Dowdeit, S.J., Edwards, J.L., Falsetta, M.L., Wu, H.J., Harrison, O.B., Fox, K.L., Seib, K.L., Maguire, T.L., Wang, A.H. *et al.* (2009) Phasevarions mediate random switching of gene expression in pathogenic *Neisseria*. *PLoS Pathog.*, **5**, e1000400.
- Srikhanta, Y.N., Fox, K.L. and Jennings, M.P. (2010) The phasevarion: phase variation of Type III DNA methyltransferase controls coordinated switching in multiple genes. *Nat. Rev. Microbiol.*, **8**, 196–206.
- Srikhanta, Y.N., Maguire, T.L., Stacey, K.J., Grimmond, S.M. and Jennings, M.P. (2005) The phasevarion: a genetic system controlling coordinated, random switching of expression of multiple genes. *PNAS*, **102**, 5547–5551.
- Kahramanoglou, C., Prieto, A.I., Khedkar, S., Haase, B., Gupta, A., Benes, V., Fraser, G.M., Luscombe, N.M. and Seshasayee, A.S. (2012) Genomics of DNA cytosine methylation in *Escherichia coli* reveals its role in stationary phase transcription. *Nat. Commun.*, **3**, 886.
- Chao, M.C., Zhu, S., Kimura, S., Davis, B.M., Schadt, E.E., Fang, G. and Waldor, M.K. (2015) A cytosine methyltransferase modulates the cell envelope stress response in the cholera pathogen. *PLoS Genet.*, **11**, e1005739.
- Kumar, S., Karmakar, B.C., Nagarajan, D., Mukhopadhyay, A.K., Morgan, R.D. and Rao, D.N. (2018) N4-cytosine DNA methylation regulates transcription and pathogenesis in *Helicobacter pylori*. *Nucleic Acids Res.*, **46**, 3429–3445.
- Suerbaum, S. and Michetti, P. (2002) *Helicobacter pylori* infection. *N. Engl. J. Med.*, **347**, 1175–1186.
- Moodley, Y., Linz, B., Bond, R.P., Nieuwoudt, M., Soodyall, H., Schlebusch, C.M., Bernhoft, S., Hale, J., Suerbaum, S., Mugisha, L. *et al.* (2012) Age of the association between *Helicobacter pylori* and man. *PLoS Pathog.*, **8**, e1002693.
- Suerbaum, S., Maynard Smith, J., Bapumia, K., Morelli, G., Smith, N.H., Kunstmann, E., Dyrek, I. and Achtman, M. (1998) Free recombination within *Helicobacter pylori*. *PNAS*, **95**, 12619–12624.
- Falush, D., Kraft, C., Taylor, N.S., Correa, P., Fox, J.G., Achtman, M. and Suerbaum, S. (2001) Recombination and mutation during long-term gastric colonization by *Helicobacter pylori*: estimates of clock rates, recombination size, and minimal age. *PNAS*, **98**, 15056–15061.
- Didelot, X., Nell, S., Yang, I., Woltemate, S., van der, M.S. and Suerbaum, S. (2013) Genomic evolution and transmission of *Helicobacter pylori* in two South African families. *PNAS*, **110**, 13880–13885.
- Falush, D., Wirth, T., Linz, B., Pritchard, J.K., Stephens, M., Kidd, M., Blaser, M.J., Graham, D.Y., Vacher, S., Perez-Perez, G.I. *et al.* (2003) Traces of human migrations in *Helicobacter pylori* populations. *Science*, **299**, 1582–1585.
- Linz, B., Balloux, F., Moodley, Y., Manica, A., Liu, H., Roumagnac, P., Falush, D., Stamer, C., Prugnolle, F., van der Merwe, S.W. *et al.* (2007) An African origin for the intimate association between humans and *Helicobacter pylori*. *Nature*, **445**, 915–918.
- Moodley, Y., Linz, B., Yamaoka, Y., Windsor, H.M., Breurec, S., Wu, J.Y., Maady, A., Bernhoft, S., Thiéberge, J.M., Phuanukoonnon, S. *et al.* (2009) The peopling of the Pacific from a bacterial perspective. *Science*, **323**, 527–530.

31. Vasu, K. and Nagaraja, V. (2013) Diverse functions of restriction-modification systems in addition to cellular defense. *Microbiol. Mol. Biol. Rev.*, **77**, 53–72.
32. Roberts, R.J., Carneiro, M.O. and Schatz, M.C. (2013) The advantages of SMRT sequencing. *Genome Biol.*, **14**, 405.
33. Flusberg, B.A., Webster, D.R., Lee, J.H., Travers, K.J., Olivares, E.C., Clark, T.A., Korlach, J. and Turner, S.W. (2010) Direct detection of DNA methylation during Single-Molecule, Real-Time sequencing. *Nat. Methods*, **7**, 461–465.
34. Krebes, J., Morgan, R.D., Bunk, B., Sproer, C., Luong, K., Parusel, R., Anton, B.P., Konig, C., Josenhans, C. and Overmann, J. *et al.* (2014) The complex methylome of the human gastric pathogen *Helicobacter pylori*. *Nucleic Acids Res.*, **42**, 2415–2432.
35. Nell, S., Estibariz, I., Krebes, J., Bunk, B., Graham, D.Y., Overmann, J., Song, Y., Spröer, C., Yang, L., Wex, T. *et al.* (2018) Genome and methylome variation in *Helicobacter pylori* with a *cag* pathogenicity island during early stages of human infection. *Gastroenterology*, **154**, 612–623.
36. Furuta, Y., Namba-Fukuyo, H., Shibata, T.F., Nishiyama, T., Shigenobu, S., Suzuki, Y., Sugano, S., Hasebe, M. and Kobayashi, I. (2014) Methylome diversification through changes in DNA methyltransferase sequence specificity. *PLoS Genet.*, **10**, e1004272.
37. Lee, W.C., Anton, B.P., Wang, S., Baybayan, P., Singh, S., Ashby, M., Chua, E.G., Tay, C.Y., Thirriot, F., Loke, M.F. *et al.* (2015) The complete methylome of *Helicobacter pylori* UM032. *BMC Genomics*, **16**, 424.
38. Vale, F.F., Megraud, F. and Vitor, J.M. (2009) Geographic distribution of methyltransferases of *Helicobacter pylori*: evidence of human host population isolation and migration. *BMC Microbiol.*, **9**, 193.
39. Srikhanta, Y.N., Gorrell, R.J., Steen, J.A., Gawthorne, J.A., Kwok, T., Grimmond, S.M., Robins-Browne, R.M. and Jennings, M.P. (2011) Phasevarion mediated epigenetic gene regulation in *Helicobacter pylori*. *PLoS One*, **6**, e27569.
40. Srikhanta, Y.N., Gorrell, R.J., Power, P.M., Tsyganov, K., Boitano, M., Clark, T.A., Korlach, J., Hartland, E.L., Jennings, M.P. and Kwok, T. (2017) Methylomic and phenotypic analysis of the ModH5 phasevarion of *Helicobacter pylori*. *Sci. Rep.*, **7**, 16140.
41. Xu, Q., Morgan, R.D., Roberts, R.J. and Blaser, M.J. (2000) Identification of Type II restriction and modification systems in *Helicobacter pylori* reveals their substantial diversity among strains. *PNAS*, **97**, 9671–9676.
42. Tomb, J.F., White, O., Kerlavage, A.R., Clayton, R.A., Sutton, G.G., Fleischmann, R.D., Ketchum, K.A., Klenk, H.P., Gill, S., Dougherty, B.A. *et al.* (1997) The complete genome sequence of the gastric pathogen *Helicobacter pylori*. *Nature*, **388**, 539–547.
43. Alm, R.A., Ling, L.S., Moir, D.T., King, B.L., Brown, E.D., Doig, P.C., Smith, D.R., Noonan, B., Guild, B.C., deJonge, B.L. *et al.* (1999) Genomic-sequence comparison of two unrelated isolates of the human gastric pathogen *Helicobacter pylori*. *Nature*, **397**, 176–180.
44. Kennemann, L., Didelot, X., Aebischer, T., Kuhn, S., Drescher, B., Droege, M., Reinhardt, R., Correa, P., Meyer, T.F., Josenhans, C. *et al.* (2011) *Helicobacter pylori* genome evolution during human infection. *PNAS*, **108**, 5033–5038.
45. Moccia, C., Krebes, J., Kulick, S., Didelot, X., Kraft, C., Bahlawane, C. and Suerbaum, S. (2012) The nucleotide excision repair (NER) system of *Helicobacter pylori*: role in mutation prevention and chromosomal import patterns after natural transformation. *BMC Microbiol.*, **12**, 67.
46. Schweinitzer, T., Mizote, T., Ishikawa, N., Dudnik, A., Inatsu, S., Schreiber, S., Suerbaum, S., Aizawa, S. and Josenhans, C. (2008) Functional characterization and mutagenesis of the proposed behavioral sensor TlpD of *Helicobacter pylori*. *J. Bacteriol.*, **190**, 3244–3255.
47. Huang, S., Kang, J. and Blaser, M.J. (2006) Antimutator role of the DNA glycosylase *mutY* gene in *Helicobacter pylori*. *J. Bacteriol.*, **188**, 6224–6234.
48. Dalia, A.B., McDonough, E. and Camilli, A. (2014) Multiplex genome editing by natural transformation. *PNAS*, **111**, 8937–8942.
49. Sharma, C.M., Hoffmann, S., Darfeuille, F., Reignier, J., Findeiß, S., Sittka, A., Chabas, S., Reiche, K., Hackermüller, J., Reinhardt, R. *et al.* (2010) The primary transcriptome of the major human pathogen *Helicobacter pylori*. *Nature*, **464**, 250–255.
50. Solovyev, V. and Salamov, A. (2011) Automatic annotation of microbial genomes and metagenomic sequences. In: Li, R.W. (ed) *Metagenomics and its Applications in Agriculture, Biomedicine and Environmental Studies*. Nova Science Publishers, pp. 61–78.
51. Vanet, A., Marsan, L., Labigne, A. and Sagot, M.F. (2000) Inferring regulatory elements from a whole genome: an analysis of *Helicobacter pylori*  $\sigma$ 80 family of promoter signals. *J. Mol. Biol.*, **297**, 335–353.
52. Schneider, C.A., Rasband, W.S. and Eliceiri, K.W. (2012) NIH image to ImageJ: 25 years of image analysis. *Nat. Methods*, **9**, 671–675.
53. Bönig, T., Olbermann, P., Bats, S.H., Fischer, W. and Josenhans, C. (2016) Systematic site-directed mutagenesis of the *Helicobacter pylori* CagL protein of the Cag type IV secretion system identifies novel functional domains. *Sci. Rep.*, **6**, 38101.
54. Stein, S.C., Faber, E., Bats, S.H., Murillo, T., Speidel, Y., Coombs, N. and Josenhans, C. (2017) *Helicobacter pylori* modulates host cell responses by CagT4SS-dependent translocation of an intermediate metabolite of LPS inner core heptose biosynthesis. *PLoS Pathog.*, **13**, e1006514.
55. Kearse, M., Moir, R., Wilson, A., Stones-Havas, S., Cheung, M., Sturrock, S., Buxton, S., Cooper, A., Markowitz, S., Duran, C. *et al.* (2012) Geneious Basic: an integrated and extendable desktop bioinformatics platform for the organization and analysis of sequence data. *Bioinformatics*, **28**, 1647–1649.
56. Love, M.I., Huber, W. and Anders, S. (2014) Moderated estimation of fold change and dispersion for RNA-seq data with DESeq2. *Genome Biol.*, **15**, 550.
57. Roberts, R.J., Vincze, T., Posfai, J. and Macelis, D. (2015) REBASE—a database for DNA restriction and modification: enzymes, genes and genomes. *Nucleic Acids Res.*, **43**, D298–D299.
58. Han, K.D., Ahn, D.H., Lee, S.A., Min, Y.H., Kwon, A.R., Ahn, H.C. and Lee, B.J. (2013) Identification of chromosomal HP0892–HP0893 Toxin-Antitoxin proteins in *Helicobacter pylori* and structural elucidation of their protein-protein interaction. *J. Biol. Chem.*, **288**, 6004–6013.
59. Azevedo, N.F., Almeida, C., Cerqueira, L., Dias, S., Keevil, C.W. and Vieira, M.J. (2007) Coccoid form of *Helicobacter pylori* as a morphological manifestation of cell adaptation to the environment. *Appl. Environ. Microbiol.*, **73**, 3423–3427.
60. Dorer, M.S., Sessler, T.H. and Salama, N.R. (2011) Recombination and DNA repair in *Helicobacter pylori*. *Annu. Rev. Microbiol.*, **65**, 329–348.
61. Hershberg, R. and Petrov, D.A. (2011) Evidence that mutation is universally biased towards AT in bacteria. *PLoS Genet.*, **6**, e1001115.
62. Dossumbekova, A., Prinz, C., Gerhard, M., Brenner, L., Backert, S., Kusters, J.G., Schmid, R.M. and Rad, R. (2006) *Helicobacter pylori* outer membrane proteins and gastric inflammation. *Gut*, **55**, 1360–1361.
63. Hofreuter, D., Odenbreit, S. and Haas, R. (2001) Natural transformation competence in *Helicobacter pylori* is mediated by the basic components of a Type IV secretion system. *Mol. Microbiol.*, **41**, 379–391.
64. Montefusco, S., Esposito, R., D’Andrea, L., Monti, M.C., Dunne, C., Dolan, B., Tosco, A., Marzullo, L. and Clyne, M. (2013) Copper promotes TFF1-mediated *Helicobacter pylori* colonization. *PLoS One*, **8**, e79455.
65. Haley, K.P. and Gaddy, J.A. (2015) Metalloregulation of *Helicobacter pylori* physiology and pathogenesis. *Front. Microbiol.*, **6**, 911.
66. Haakonsen, D.L., Yuan, A.H. and Laub, M.T. (2015) The bacterial cell cycle regulator GcrA is a  $\sigma$ 70 cofactor that drives gene expression from a subset of methylated promoters. *Genes Dev.*, **29**, 2272–2286.
67. Kumar, R., Mukhopadhyay, A.K., Ghosh, P. and Rao, D.N. (2012) Comparative transcriptomics of *H. pylori* strains AM5, SS1 and their *hpyAVIBM* deletion mutants: possible roles of cytosine methylation. *PLoS One*, **7**, e42303.
68. Lafay, B., Atherton, J.C. and Sharp, P.M. (2000) Absence of translationally selected synonymous codon usage bias in *Helicobacter pylori*. *Microbiology*, **146**, 851–860.
69. Donczew, R., Weigel, C., Lurz, R., Zakrzewska-Czerwinska, J. and Zawilak-Pawlik, A. (2012) *Helicobacter pylori* oriC—the first bipartite origin of chromosome replication in Gram-negative bacteria. *Nucleic Acids Res.*, **40**, 9647–9660.
70. Ye, F., Brauer, T., Niehus, E., Drlica, K., Josenhans, C. and Suerbaum, S. (2007) Flagellar and global gene regulation in *Helicobacter pylori* modulated by changes in DNA supercoiling. *Int. J. Med. Microbiol.*, **297**, 65–81.
